# Supplementary material for: Fabrication of quasi-cubic Fe3O4@rGO composite via a colloid electrostatic self-assembly process for supercapacitors
Source: Royal Society of Chemistry journal article supplement (doi:10.1039/c4ra07224c), 2014-01-01
Supplement: c4ra07224c1.pdf [file c4ra07224c1.pdf]

## Electronic Supplementary Information (ESI) for

### Fabrication of Novel Cubic-Fe<sub>3</sub>O<sub>4</sub>@rGO Composite via Colloid

### Electrostatic Self-assembly Process for Supercapacitors

*Tiezhu Liu,<sup>a</sup> Xudong Zhang,<sup>a</sup> Baojun Li,<sup>a</sup> Jie Ding,<sup>a</sup> Yushan Liu,<sup>\*a</sup> Ge Li,<sup>a</sup> Xianghe Meng,<sup>a</sup> Qiang Cai<sup>b</sup> and Jianmin Zhang<sup>\*,a</sup>*

<sup>†</sup> College of Chemistry and Molecular Engineering, Zhengzhou University, 100 Science Road, Zhengzhou 450001, P R China

<sup>‡</sup> Key Laboratory for Advanced Materials of Ministry of Education and College of Materials Science and Engineering, Tsinghua University, Beijing 100084, PR China

**\* Corresponding Author:** liuyushan@zzu.edu.cn and zhjm@zzu.edu.cn

#### Experimental section

*Synthesis of graphene oxide.* Graphene oxide (GO) was synthesized using the following modified Hummer's method.<sup>S1</sup> Graphite (2 g) was mixed with concentrated H<sub>2</sub>SO<sub>4</sub> (69 mL) and the mixture was stirred for 30 min within an ice bath. KMnO<sub>4</sub> (8 g) was added very slowly into the dark suspension and the reaction mixture was stirred and sonicated for another 15 min under a reaction temperature of 20 °C. Then the ice bath was removed, and the mixture was stirred at 35 °C overnight. Distilled water was added to the pasty solution under magnetic stirring and the color of the solution turned to yellowish brown. After another 2 h of vigorous stirring, H<sub>2</sub>O<sub>2</sub> (30wt %, 25 mL) was added and the color turned golden yellow immediately. The mixture was washed with HCl (5 %) for several times and then deionized water until the solution became acid free. The reaction mixture was filtered and dried under vacuum at 65 °C. The GO was obtained as a gray powder and used for the further experimental.

Fe(OH)<sub>3</sub> colloid solution was prepared using the method reported previously<sup>S2</sup>. 200mL of deionized water was boiled for 2 min, and then 40mL of FeCl<sub>3</sub> solution (10%

wt) was added dropwisely into the boiling water. After that, it needs to be heated for another 2 min to obtain the  $\text{Fe}(\text{OH})_3$  colloid solution. The  $\text{Fe}(\text{OH})_3$  colloid solution was cooled to room temperature for the further experiments.

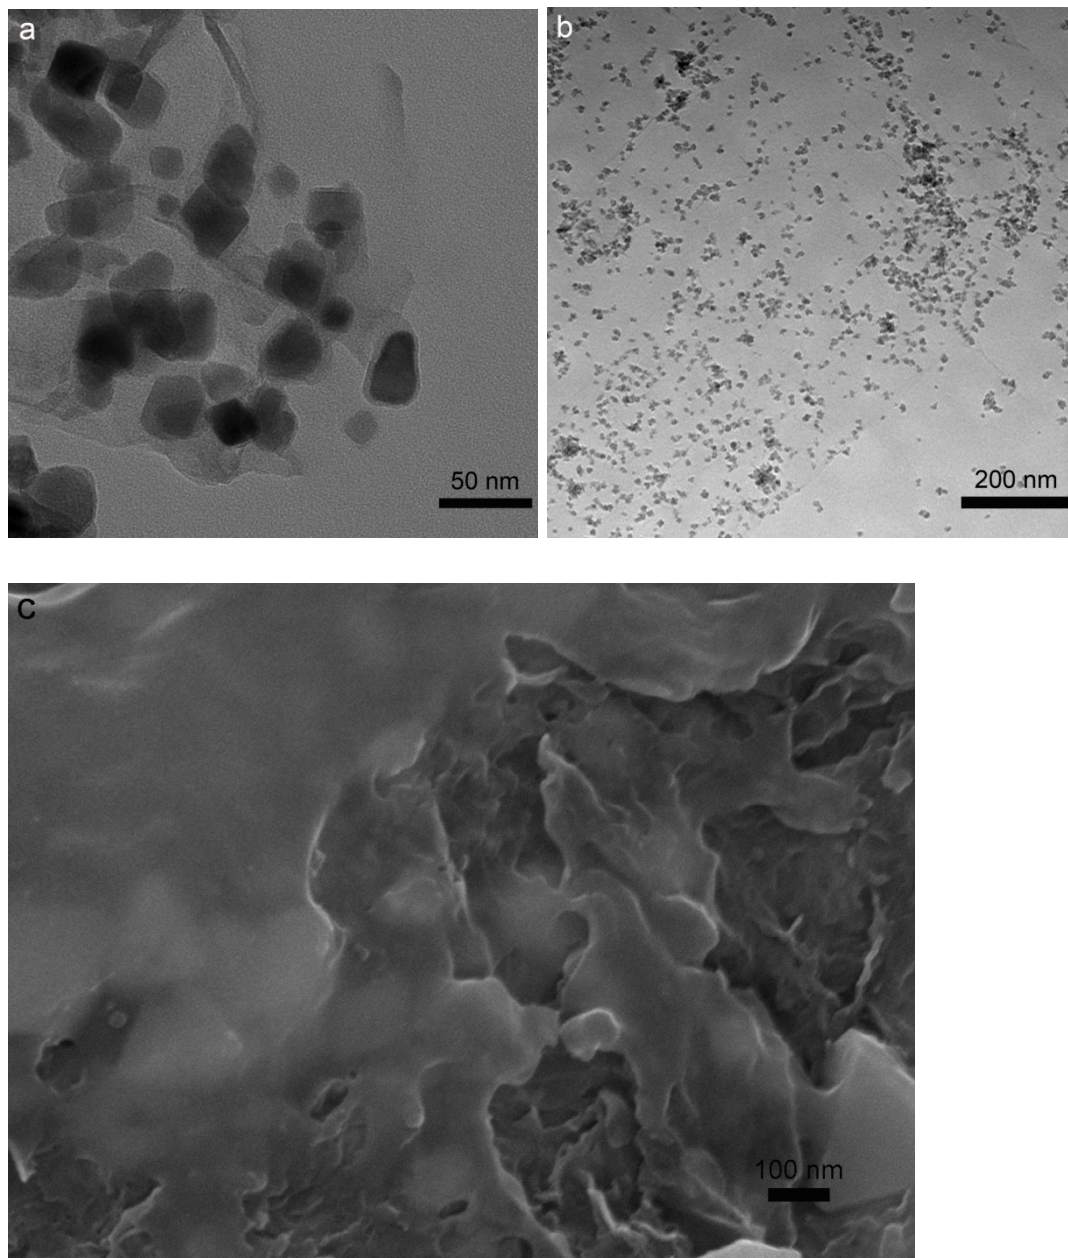

**Fig. S1** (a) TEM images of CFGC nanocomposite; (b) TEM images of  $\text{Fe}(\text{OH})_3$ /graphene oxide nanocomposite; (c) SEM images of CFGC nanocomposite.

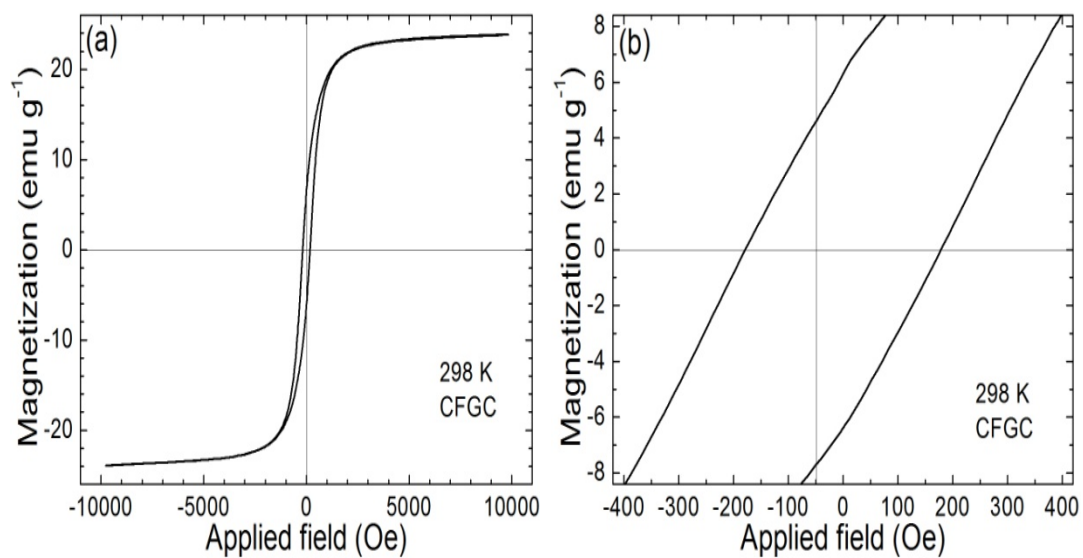

**Figure S2.** Magnetization curves for the CFGC.

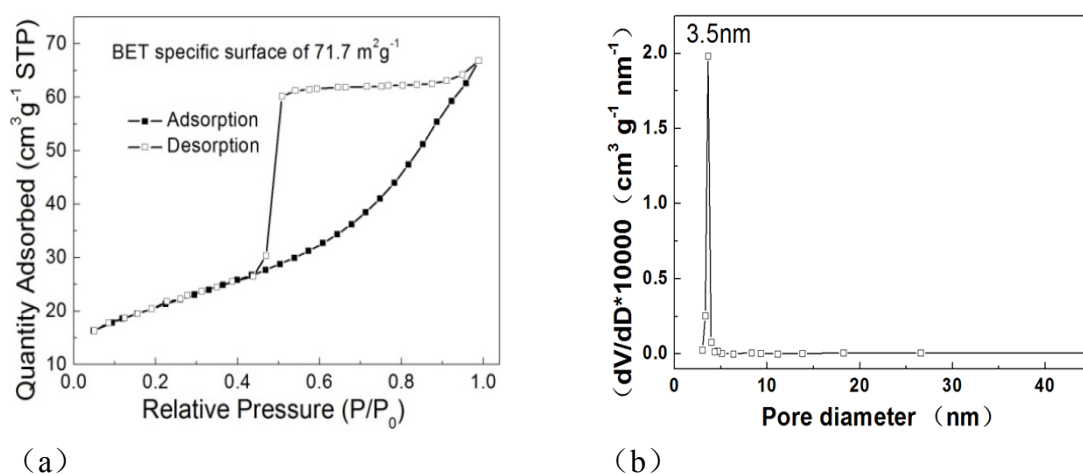

**Figure S3.** (a) Nitrogen adsorption-desorption isotherms at 77 K. and (b) pore width distribution of CFGC.

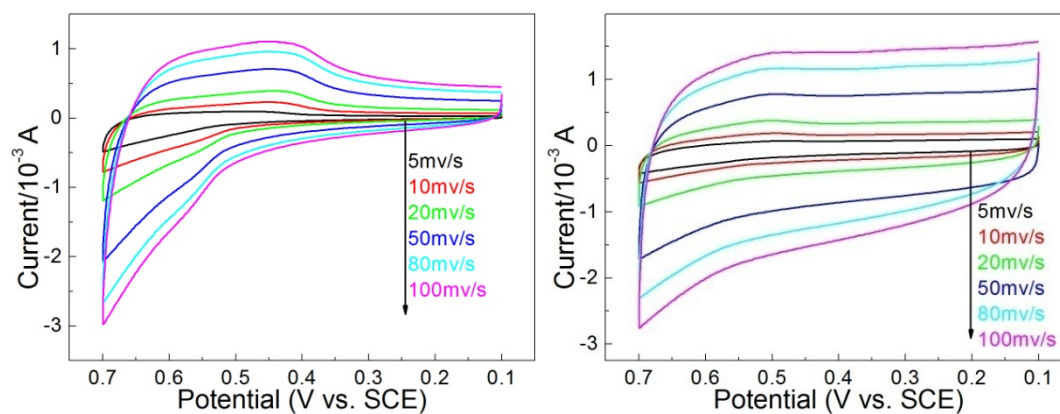

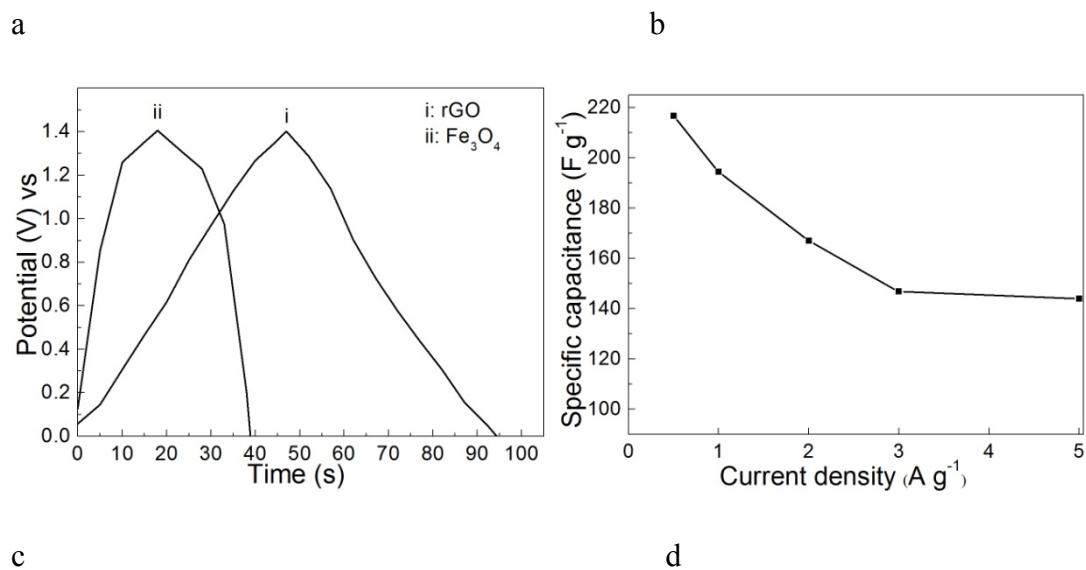

**Figure S4.** (a) The cyclic voltammogram (CV) curves of Fe<sub>3</sub>O<sub>4</sub> under the different scan rates of 5, 10, 20, 50, 80, and 100 mV s<sup>-1</sup>; (b) The cyclic voltammogram (CV) curves of rGO under the different scan rates of 5, 10, 20, 50, 80, and 100 mV s<sup>-1</sup>; (c) (i) rGO and (ii) Fe<sub>3</sub>O<sub>4</sub> GCD curves at current density of 500 mA g<sup>-1</sup>; (d) Specific capacitance of CFGC at different current densities.

## References

- [S1] W. S. Hummers and R. E. Offeman, *J. Am. Chem. Soc.*, 1958, **80**, 1339–1339.
- [S2] Y. T. Chen, G. Fei, Y. Qiu, H. Hu, I. Kulaots, E. Walsh and R. H. Hurt, *ACS Nano*, 2013, **7**, 3744–3753.
